# The Role of Androgens and Estrogens on Healthy Aging and Longevity

Astrid M. Horstman, E. Lichar Dillon, Randall J. Urban, and Melinda Sheffield-Moore

Division of Endocrinology and Metabolism, Department of Internal Medicine, University of Texas Medical Branch, Galveston.

Address correspondence to Astrid M. Horstman, PhD, Division of Endocrinology, Department of Internal Medicine, The University of Texas Medical Branch, 301 University Blvd., Galveston, TX 77555-1060. Email: ashorstm@utmb.edu

Aging is associated with a loss of sex hormone in both men (andropause) and women (menopause). In men, reductions in testosterone can trigger declines in muscle mass, bone mass, and in physical function. In women, the impact of the loss of sex hormones, such as estradiol, on bone is well elucidated, but evidence is limited on whether the loss of estradiol negatively affects muscle mass and physical function. However, deficiencies in multiple anabolic hormones have been shown to predict health status and longevity in older persons. Thus, consideration should be given as to whether targeted hormone replacement therapies may prove effective at treating clinical conditions, such as age-related sarcopenia, cancer cachexia, and/or acute or chronic illnesses. If initiated carefully in the appropriate clinical population, hormone replacement therapies in men and women may prevent and reverse muscle and bone loss and functional declines and perhaps promote healthy aging and longevity.

**Key Words:** Testosterone—Longevity—Sarcopenia—Aging—Muscle.

Received September 23, 2011; Accepted January 24, 2012

Decision Editor: Rafael de Cabo, PhD

AGING is a natural multidimensional process that involves physical, psychological, and social changes, which ultimately affects life span. Elucidation of the underlying physiological mechanisms that are impaired with aging may positively influence the physical aging process and extend healthy aging. A major feature of aging is loss of physical function, and an important underlying factor is the loss of skeletal muscle mass that accompanies aging. Often overlooked is the role that hormones play as key regulators of human muscle metabolism (1) and their influence on physical function. Aging is associated with a loss of sex hormones (androgens and estrogens), which in turn may be responsible for triggering muscle loss, muscle weakness, decreased functional performance, and decreased life span.

A contradiction of aging exists upon comparison of muscle loss between older men and women. This contradiction may, in part, be explained by hormones prior to and following andropause in men and menopause in women. For example, the rate and magnitude of muscle gain and loss between men and women differ throughout the life span. In women, an accelerated loss of muscle mass and strength occurs at an earlier age than in men (2–6), but life expectancy is higher in women compared with men (7). Thus, as women tend to live longer, they are more susceptible to age-related health problems and in particular to declines in muscle mass (8) when compared with men. However, whether there are positive relationships between age-related loss of sex hormones, declines in muscle mass,

and physical function versus longevity has not been studied. In this review, we provide a broad overview of the physiology and role that androgens and estrogens play in enhancing healthy aging and human longevity.

## ANDROGENS

### *Androgen Physiology*

Gonadotropin-releasing hormone (GnRH), produced and released by the hypothalamus, stimulates the production and pulsatile release of luteinizing hormone and follicle-stimulating hormone in the anterior pituitary. Follicle-stimulating hormone is primarily involved in sperm production and luteinizing hormone in testosterone secretion. Luteinizing hormone enters the circulation and is transported to the gonads where it activates the synthesis and secretion of testosterone. Ninety-five percent of androgen production occurs in the Leydig cells of the testes (9), and men have a 20- to 25-fold higher testosterone production when compared with women (10). The physiological effects of testosterone are induced by its binding to the intracellular androgen receptor, which then translocates to the nucleus where the androgen receptor–testosterone complex induces transcription of specific genes (11). Testosterone imparts multiple physiological effects including involvement in spermatogenesis, testicular function, hair growth, nitrogen retention, bone density, muscle mass and distribution, libido, and secondary sexual characteristics (12).

### *Androgens and the Aging Man*

Aging is associated with a gradual decline in circulating testosterone concentrations and decreased musculature in men (13–16). Endogenous testosterone production gradually decreases with aging in men. This may result from reduced testicular responses to gonadotrophin stimuli with aging, coupled with incomplete hypothalamo-pituitary compensation for the fall in total and free testosterone levels (17,18). Beginning around the age of 35–40 years, circulating testosterone concentration levels decrease by approximately 1%–3% per year (19). Approximately 20% of men older than 60 years and 50% of men older than 80 years have serum testosterone concentrations below the normal range for young men (13). The most obvious clinical signs of relative deficiency in older men are a decrease in muscle mass and strength, a decrease in bone mass, and an increase in central body fat. Lowering serum testosterone concentrations in healthy volunteers decreases fat-free mass, muscle strength, and mixed muscle fractional synthetic rate (20), but testosterone supplementation increases fractional synthetic rate in young hypogonadal men (21) and older men (22–24). Moreover, restoring testosterone to youthful levels is shown to increase synthesis of myofibrillar proteins, total body cell mass, and muscle strength (24,25). Declining testosterone levels that accompany aging may also be a contributing factor to increased and redistributed fat mass and to decreased fat-free mass (musculature [26–29]). This decline in muscle mass translates to decreased muscle strength, which in turn leads to functional limitations, such as balance problems, a higher fall risk, injuries, chronic conditions, such as obstructive sleep apnea, depression, obesity, chronic obstructive pulmonary disease, type 2 diabetes mellitus, renal or liver disease (30–36), decreased quality of life, and higher risk of morbidities and mortalities with aging (37,38).

The influence of testosterone on protein metabolism is well known (21,24,39), however, testosterone also plays a significant role in glucose and lipid homeostasis (40,41) and bone metabolism. Low total testosterone levels in older men (>60 years) are associated with an increased prevalence of osteoporosis, increased incidence of rapid bone loss at the hip (42), and an increased incidence of hip fractures and nonvertebral fractures (43). Osteoporosis is an increasingly recognized problem in older men with associated fracture morbidity and mortality on the rise. Thus, not only does the loss of testosterone negatively affect muscle mass in older men, it appears to also increase the risk of osteoporosis and fractures further contributing to increased morbidity and mortality in older men (44).

Whether the age-dependent decline in androgen levels directly leads to the development of health problems in older men is being debated vigorously (17,18,45–47). Carefully controlled large-scale studies are needed to determine whether testosterone's pleiotropic effects are of benefit or harm to healthy aging and longevity.

### *Androgens and the Aging Woman*

Although women have a 20- to 25-fold lower circulating concentrations of androgens compared with men (10), androgens are precursors for estrogen production and synthesis and play a key role in the maturation processes of ovarian follicles in women (48). While it remains to be seen whether testosterone plays a significant biological function in women, androgen deficiencies in aging women have been associated with impairments in sexual function, lean body mass and performance, cognitive function, emotions, bone loss, and frailty (49–53). Testosterone levels in women decline in the fourth decade of life and prior to menopause approach 50% of those seen in the third decade (54). Upon completion of menopause, average concentrations of testosterone in women are approximately 15% of premenopause levels (54,55). Additionally, some women experience further (~60%) reductions within 2–5 years following menopause (56). Although the biological role of testosterone in women remains unclear, the sharp and rapid decline in androgen levels that accompany aging in women may play a critical role in the functional limitations seen in aging and may increase morbidity. Thus, there may be a therapeutic role for testosterone replacement among menopausal and postmenopausal women, although careful assessment of the menopause age and monitoring of symptoms should be considered so that the lowest effective dose of testosterone can be selected.

### *Androgens and Inflammation*

Aging is characterized by a low-grade inflammatory status. Serum levels of inflammatory markers increase with age in both sexes. The level of inflammatory markers is a strong and independent risk factor for frailty, disability, and cardiovascular events (57–59), and inflammation influences loss of muscle mass (60). The low-grade inflammatory status often detected in older persons is connected with the hormonal changes occurring with aging (58). Testosterone has been found capable of reducing systemic inflammatory cytokines such as tumor necrosis factor- $\alpha$ , interleukin-6, and interleukin-1 $\beta$  (61–63) and stimulating the anti-inflammatory cytokine interleukin-10 (64,65). However, in premenopausal and older women, high testosterone and estradiol and low sex hormone-binding globulin levels are associated with insulin resistance and diabetes, conditions characterized by low-grade inflammation (66). Thus, age-related changes in sex hormones contribute to the development of a proinflammatory state. Hormonal changes and their potential effects on inflammation may, in part, affect conditions, such as atherosclerosis, cardiovascular diseases, metabolic syndrome, and type 2 diabetes. Although the role of sex hormones on aging and age-related diseases is still unclear, there are clear age associations, which are likely reducing healthy aging and negatively impacting longevity.

## ESTROGENS

### *Estrogen Physiology*

Estrogens are a class of steroid molecules secreted primarily by the ovaries (67) and placenta and, to a lesser extent, by peripheral steroidogenic conversion and by the testes in men (67). Women have about four times the amount of estrogens compared with men (10). Estrogens promote the development of female genital organs and features, growth of the endometrium, and inhibit the secretion of follicle-stimulating hormone by the pituitary. The important actions of the endogenous estrogens are mediated by estrogen receptors (ERs). ERs are synthesized in many cell types in two protein forms, ER $\alpha$  and ER $\beta$ , which function as transcription factors once bound with their ligand. ER $\alpha$  is expressed in several tissues including uterus, prostate (stroma), ovary, testes, bone, breast, white adipose tissue, liver, and muscle, and ER $\beta$  is expressed in colon, prostate (epithelium), testes, salivary gland, bone marrow, and vascular endothelium (68). Estrogens are primarily involved in the development and maintenance of normal sexual and reproductive function in women (69). Moreover, estrogens have also been shown to exert a wide range of biological effects in many physiological systems in both women and men (70). Estrogens mitigate postinjury disruption and inflammatory responses (67,71,72) and may play a protective role against oxidative stress (73) and muscle damage (by its antioxidant and membrane-stabilizing properties), repair, and inflammation (74). Estradiol also affects satellite cell activation and proliferation, thereby enhancing the growth and recovery potential of cells (74). Moreover, myosin function is affected by age and by estradiol in women (75). Estrogens and ERs in the skeletal muscle cells of women (76) regulate carbohydrate and lipid metabolism. These receptors have been hypothesized to play a role on muscle strength (55) through the action by both estrogens and insulin-like growth factor (IGF)-1 (76–78).

### *Estrogens and Skeletal Muscle*

There is a body of evidence that estradiol plays a role in muscle strength. When estradiol is diminished, significant decrements in the force-generating capacity of hind-limb muscles in mice will occur (79), even when controlling for physical and muscular activities of the mice (80). The decrease in strength fully recovers after estradiol replacement, thus estradiol is an important hormone that affects muscle contractile function (79). Estradiol also plays a role in the level of antioxidant enzymes. Ovariectomized mice have lower levels of antioxidant enzymes in the heart, such as glutathione peroxidase, catalase, and superoxide dismutase (81,82). Antioxidant as well as ER- $\alpha$  gene expression in skeletal muscle of mice acutely and chronically responds to changes in circulating estradiol, which is another indication of estrogen-mediated mechanisms influencing contractility of skeletal muscle (83).

Treatment of embryonic zebra fish with aromatase inhibitor 4-hydroxyandrostenedione, binding to the aromatase enzyme and thereby inhibiting the conversion of testosterone or androstenedione to estradiol, denervates the zebra fish trunk muscles (84). This shows that estradiol synthesis plays an important role in not only the central nervous system (85) but also in developing the peripheral nervous system, particularly at the neuromuscular junction. In an in vitro study with fused bovine cell cultures, Kamanga-Sollo and colleagues (86) showed that protein synthesis increased and degradation decreased when treated with estradiol. The underlying mechanisms involved ERs and the IGF-1 receptor. Future studies should determine how this affects skeletal muscle function during aging, associated with a decline in circulating estrogens and muscle weakness.

Although the predominance of data demonstrating the isolated effects of estrogen on muscle tissue come from animal and in vitro studies, a few studies have demonstrated these effects in humans. The meta-analysis of Greising and colleagues (87) showed that postmenopausal women on estrogen hormone therapy had greater physical strength than those without treatment. Another study on twins showed that the siblings receiving hormone therapy had greater muscle power and maximal walking speed than the treatment naive twins (88). MacNeil and colleagues (74) have shown that 1 mg of estradiol for 2 days followed by 2 mg estradiol for 8 days attenuates exercise-induced neutrophil infiltration in young men, which may have resulted from direct neutrophil/endothelial interaction. Another human study showed that 8 days of estradiol supplementation increases lipid metabolism in skeletal muscle of moderately active men. This may be regulated by alteration the protein content of medium-chain acyl-CoA (MCAD), possibly through peroxisome proliferator-activated receptor  $\gamma$  coactivator 1- $\alpha$  (PGC-1 $\alpha$ )-mediated transcription and decrease of miR-29b, leading to increased mitochondrial gene expression (MCAD and hippuric acid [HA]) and thus lipid utilization (89).

### *Estrogens and the Aging Woman*

During the first year of menopause, women lose on average 80% per year of their estrogens (73). They exhibit an accelerated decline in muscle mass and strength around the time of the menopause (2,4,90–95), which is related to this loss of estrogens (4,96) and causes subsequent decreases in function (76,97). Higher endogenous estrogen levels were associated with higher muscle strength and lower rates of fall-related limb fractures even after adjusting for bone mineral density in 75-year-old women (97). Estrogens may also potentially stimulate muscle repair and regenerative processes, although the mechanisms by which estrogens exert influence on muscle damage, inflammation, and repair have not been fully elucidated (98). It is thought that estrogens influence indices of muscle damage

and repair (75) by (i) acting as an antioxidant, thus limiting oxidative damage (82), (ii) acting as a membrane stabilizer by intercalating within membrane phospholipids, and (iii) binding to ERs, thus governing the regulation of a number of downstream genes and molecular targets (75). Also Vina and colleagues (73) showed that estrogens play a protective role against oxidative stress. Estrogens can participate in the antioxidant system because it decreases the expression of nicotinamide adenine dinucleotide phosphate (NADPH) oxidase, an important source of superoxide radical, and increases nitric oxide (NO) bioavailability (99). Moreover, estradiol activates mitogen-activated protein kinase and nuclear factor- $\kappa$ B signaling after binding to the ER. This stimulates the expression of mitochondrial antioxidant enzymes such as manganese superoxide dismutase and glutathione peroxidase and results in reduced reactive oxygen species production of mitochondria in women, possibly contributing to the longer expected life span of women compared with men. Whether (phyto)estrogens therapy leads to increasing the male life span to similar levels as that of women, remains to be elucidated.

Estrogens also play a key role in regulation of bone mass and strength by controlling activity of bone-forming osteoblasts and inhibiting activity and vitality of bone-resorbing osteoclasts (100). Bone tissue is essential for structural support and locomotion in the vertebrae and critical for hematopoiesis. Bones also serve as an endocrine organ in the regulation of calcium homeostasis (101). Besides a marked decrease in muscle mass, postmenopausal women also show a marked decrease in bone mineral density and high-turnover bone metabolism, which leads to postmenopausal osteoporosis (102). When these women are treated with exogenous estrogens, the decrease in bone mass and increase in bone turnover are reversed. This suggests that estrogens have a bone protective effect (100).

#### *Estrogens and the Aging Man*

Estrogens in men are produced through aromatization, a process in the limbic system and brain tissues by which the body converts testosterone into estradiol (103–105). Although little is known about the role of estrogens in men, with most studies conducted on animals and not humans, estrogens may have a potential role in the regulation of Leydig cell development and function. During development, estrogens inhibit development of Leydig cells from precursor cells, whereas in adults, estrogens can block androgen production and Leydig cell generation (106). In the testes, both ER $\alpha$  and ER $\beta$  are expressed, however, the role of gonadal ERs in mediating the effects of estrogens during development is not yet clear (107). Estrogens are important regulators of bone health not only in women but also in men (108,109), although the relative contribution of androgens versus estrogens in the regulation of the male skeleton is unclear (110). Serum levels of both estrogens and

androgens decrease with age (108) and are inversely associated with the risk of fracture in aging men.

#### **GROWTH HORMONE AND IGF-1**

Growth hormone (GH), produced in the anterior pituitary gland, is released into the circulation in a pulsatile manner and predominantly stimulates the liver to produce IGF-1 (111). GH has direct effects on tissues such as brain and muscle as well as indirect paracrine and autocrine effects, via stimulation of the local production of IGF-1 in target tissues. GH and IGF-1 signaling is a vital pathway in the regulation of protein synthesis and glucose metabolism (112). The GH and IGF-1 axis in aging, like deficiencies in sex steroid hormones, appears to be linked with changes in the hypothalamic-pituitary-adrenal axis, affecting muscle and bone physiology (113). The decrease in age-associated changes in GH, caused by hormonal signals, gender, neurotransmitters, nutritional status, body composition, and physical activity levels, correlates with increasing adiposity, decreased physical performance (111), and decreased testosterone levels (114). GH levels in women fall significantly after menopause (111).

High levels of IGF-1 are a risk factor for many types of cancers (115–117), whereas low IGF-1 has been implicated in the pathogenesis of a wide range of conditions, such as type 2 diabetes (118), osteoporosis (119), and coronary heart disease (120). Moreover, a decline in IGF-1 often occurs with increasing age (121), and low IGF-1 levels are associated with frailty (122) and an increased risk of death (123).

Recent data indicate that reduced somatotrophic signaling provides protection from cancer and other age-related diseases and may promote old age survival (124,125). The balance of GH and IGF-1 seems to be a well-recognized target of intervention that extends longevity. However, the role of the GH/IGF-1 pathway in the modulation of human longevity continues to be hotly debated.

#### *Healthy Aging and Longevity: The Possible Testosterone and Exercise Link*

*Men.*—Testosterone stimulates skeletal muscle protein synthesis (anabolic effect) and inhibits protein degradation (anticatabolic effect) in the skeletal muscle of humans, regardless of age. Similarly, resistance exercise strongly stimulates muscle protein synthesis (126,127). In combination, exercise and testosterone strongly promote muscle hypertrophy and are also thought to promote bone health. Resistance exercise can induce acute subtle increases in serum testosterone; however, a high relative intensity and a high total volume of resistance exercise must be performed to acutely induce physiologically significant increases in concentrations of testosterone necessary to increase muscle anabolism (128). It is more likely that the resistance exercise causes contraction-induced stimulation of muscle protein synthesis rather than an induction of muscle protein synthesis

as a result of acute increases in serum testosterone. The endocrine response for the days following resistance training is unclear. Very recently, Aizawa and colleagues (129) showed that 12 weeks of aerobic exercise training enhanced the messenger RNA and protein expression of enzymes involved in steroidogenesis within skeletal muscle of male rats, such as  $3\beta$ -HSD, P450arom, and  $5\alpha$ -reductase. This suggests that chronic endurance exercise training improves the production of steroids in skeletal muscle, which may assist in the muscular adaptation in skeletal muscle after training.

The testosterone response to resistance exercise is also greatly affected by age. In older ( $\geq 59$  years) men (130–133), a bout of resistance exercise can elicit a significant elevation in circulating total and free testosterone, but the magnitude of this elevation is generally smaller compared with that in younger (20–30 years) men (130,132–134). Thus, although promising, further research is necessary to establish the extent to which resistance training in older men may synergistically work with testosterone to positively influence muscle anabolism, muscle strength, functional performance, and eventually longevity.

*Women.*—Findings on the testosterone response to a bout of heavy resistance exercise in women are equivocal with both increases (131,135–137) and no changes observed (138–141). Kvorning and colleagues (142) have shown that the Leydig cells are likely involved in the acute resistance exercise–induced increase in testosterone in men, but women do not have Leydig cells. The resistance exercise–induced increases in testosterone in women found in some studies could be simply due to a reduction in plasma volume, which could cause an increase in circulating testosterone concentration without a change in the amount of testosterone in the circulation. Another reason for the acute increase in free testosterone in women following resistance exercise could be a byproduct of cortisol production. Adrenocorticotrophic hormone concentration increases in response to heavy exercise (143) and stimulates production and release of cortisol and causes release of testosterone from the adrenal cortex (144).

The testosterone response to resistance exercise and training in aging women is similar (either an acute increase or no change) to that for younger women (128), whereas others found that in middle-aged and older women who are untrained, total and free testosterone do not change acutely in response to high (131,145) or moderate (146) volume resistance exercise. In fact, the importance of testosterone for adaptations to resistance exercise in women has not been substantially examined, but it appears that testosterone plays only a minor role. One factor worth mentioning is that the above findings may simply reflect lack of sensitivity of testosterone assays, given the small detection range in women.

Thus, whereas testosterone seems to have only a small contribution to adaptations to resistance exercise in aging

women, high intensity, and volume exercise training probably does elicit a testosterone response in older men which leads to increase in muscle strength, which in turn may counteract frailty and in that way indirectly contribute to improved quality of life, extended health span, and increased longevity. Skeletal muscle is sensitive to training up to a high age (147–149), although continuing exercising does not completely counteract age-related decreases in muscle strength (150). Therefore, additional methods to preserve muscle mass with aging would be useful. Because part of the decreases in muscle size, loss of bone, and increases in fat might be related to changes in the endocrine system, additional androgens or estrogens in combination with exercise may combat the extra decline in muscle strength that occurs with andropause and menopause.

### HORMONE DEFICIENCIES, THERAPIES, AND LONGEVITY

Hormone deficiencies of all kinds can negatively affect health and longevity, complicating such a discussion. Testosterone therapies, and to a lesser extent estradiol and GH replacement, have increased substantially over the past several years and are widely used as function promoting therapies in older men and women (36) by increasing protein anabolism and reducing protein catabolism in skeletal muscle. Whether this approach will lead to increased longevity remains unanswered, however, mounting evidence suggests that significant gains in health through enhanced functional performance is an approach worth further investigation. Additional large-scale research is needed to provide the data necessary to determine the safety and efficacy of hormone replacement with age and to elucidate what its influence is on functional performance, enhanced health span and longevity.

### Androgens

Age-associated declines in anabolic hormone levels are strong independent predictors of mortality in older men (151). Beyond its influence on skeletal muscle and frailty, testosterone deficiency can be linked to premature mortality (32,37,38) and to a number of comorbidities, such as sexual disorders, diabetes, and metabolic syndrome (including dyslipidemia, visceral obesity, hyperglycemia, hypertension, and thrombus formation process [152]). Moreover, testosterone deficiency is associated with insulin resistance and may predispose older men to the metabolic syndrome or type 2 diabetes mellitus. This also further complicates issues related to cardiovascular disease in the aging male (153–156) as these metabolic processes are all likely linked. Nieschlag and colleagues (157) found no trend toward a change in life span in castrated singers versus intact singers. This may indicate that removal of the testes in prepubertal men had no influence on the longevity in men. However, as the population ages, it could very well be that androgens may be important to combat frailty in the 8th, 9th, and 10th decades of life.

Regardless of gender, testosterone replacement may be effective in reversing age-dependent body composition changes and associated morbidity (158). Testosterone administration improves body composition by decreasing fat mass and increasing lean body mass (159–162) and muscle strength (23,24,163–167); however, not all studies confirm such (direct) changes in muscle strength or physical function (162,168–170). Randomized controlled clinical trials assessing testosterone therapy would be required to investigate whether androgens can have beneficial and/or neutral effect in the male cardiovascular disease-related morbidity (171) and mortality (172).

Testosterone therapy in women, resulting in serum levels in the normal or high-normal range, may provide significant improvements in emotional, sexual, and/or physical health. For example, Sheffield-Moore (39) showed that the skeletal muscle of women is anabolically responsive to an androgen, though the full biological impact of this effect has not been studied. Physiological testosterone therapy has shown to improve vasodilatation (173) and decrease diastolic blood pressure (174) in women. The demonstrated benefits of testosterone administration, primarily on bone and muscle, warrant further study in aging women. Additional longitudinal studies are needed to establish clearly whether androgen deficiency may directly affect cardiovascular biology and whether it might be a risk factor for cardiovascular disease during reproductive aging in women. More studies are needed to investigate whether the relative low testosterone levels in women may contribute to conditions later in life, such as mobility impairment, that are linked to disability, reduced quality of life and mortality and whether testosterone replacement therapy can reduce the negative health consequences of age-related frailty.

Testosterone has shown to reverse cachexia from cancer (175) or other inflammatory-based diseases (176–178). Also, trauma decreases testosterone production which may complicate healing and recovery in a variety of traumatic conditions (179,180). Despite the prevalence of male hypogonadism in patients with advanced cancer (181,182) and the suggested role of androgen deficiency in the pathophysiology of cancer cachexia (183), clear epidemiological data showing whether male hypogonadism is independently associated with clinical and biological sequelae of cancer cachexia is not available (184). A review of Shabsigh and colleagues (185) showed that none of the included studies demonstrated that testosterone therapy for hypogonadism, restoring testosterone levels within normal range, increased prostate cancer risk.

Thus, large-scale long-term testosterone replacement studies in older men and women are needed to determine the long-term risks and benefits of testosterone administration in older people (1,166,186). Especially in individuals with restricted or impaired functional ability, the possibility of increasing muscle strength via androgen administration would be of considerable benefit. Furthermore, additional

research on bone-specific components of protein complexes associated with sex hormones and steroid receptors is necessary to provide new insights about the mechanisms of their tissue-specific regulatory action. Such studies may lead to identification of novel therapeutic targets and development of more efficient strategies in the treatment of osteoporosis during aging.

### *Estrogens*

Lowe and colleagues (187) showed that estrogens have beneficial effects on muscle strength in postmenopausal women, and declines in estrogens have been implicated in age-related losses in muscle strength (187). However, the review by Meeuwssen and colleagues (188) highlighted controversial results. Conflicting estrogen-specific effects on skeletal muscle are also shown in Table 1 in the review from Enns and Tiidus (75). Although results on the effects of estradiol on muscle structure and contractile function in humans are conflicting (188) and depend on species examined, study type, age, muscle size, and fiber type etcetera (75), two recent well-controlled studies show beneficial effects of hormone replacement therapy on skeletal muscle composition and function in postmenopausal women (88,189).

Estrogens also play an essential role in maintenance of bone health in aging women. Estrogen deficiency in older men leads to hypergonadotropism, osteoporosis, and increased testosterone levels. Estrogen deficiency has a significant effect on carbohydrate and lipid metabolism, and estrogen resistance is associated with evidence of premature coronary atherosclerosis in men (190,191). Low estrogen concentrations in both men and women are associated with an increased risk of cardiovascular events (192–195).

Estrogen-based hormone therapy helps preserve muscle strength (87). In aging women, hormone replacement is the first line and most effective treatment for menopausal symptoms and improvement of low quality of life due to estrogen deficiency (196). However, Michael and colleagues (197) showed that hormone treatment provided no overall protection against functional decline in nondisabled postmenopausal women (65–79 years). Undesirable effects of prolonged postmenopausal exposure to estrogens replacement are increased risk of cancer (198) and increased rates of venous thromboembolism and biliary tract surgery for older women with coronary disease (199,200). This is clearly an area that requires further investigation.

### *Growth Hormone*

In both GH deficiency and GH excess, increased incidence of cardiovascular disease has been reported as a contributing factor to reduced life expectancy. Although reduced longevity observed in hypopituitarism has been attributed to GH deficiency, it is unclear whether GH deficiency or other confounding factors cause this early mortality. Aguiar-Oliveira and colleagues (201) showed that in a

selected genetic background, untreated lifetime isolated GH deficiency does not affect longevity. However, Besson and colleagues (202) showed reduced longevity in untreated patients with isolated GH deficiency and conclude that current evidence supports the use of GH replacement in adults suffering from either childhood- or adult-onset GH deficiencies. This is in line with others (203,204) who found that GH deficiency is associated with an elevated cardiovascular risk and that hypopituitary patients with long GH and IGF-1 deficiency have a shorter survival period from, and premature mortality due to, cardiovascular complications (205,206). Having multiple hormonal deficiencies rather than a deficiency in a single anabolic hormone is proven to be a robust biomarker of health status and mortality in older persons (151,207).

GH replacement reduces body fat and visceral adipose tissue, reduces low-density lipoprotein cholesterol and triglyceride levels, and improves endothelial function. Elhadd and colleagues (208) found significant endothelial dysfunction in hypopituitarism, pointing to early atherosclerosis in hypopituitary GH deficient adults. GH replacement is also shown to reduce intima-media thickness of major arteries and to improve left ventricular performance. Although these results have been observed only in small series of patients treated on a short-term basis (209), they strongly support the beneficial effects of GH replacement in adults with GH deficiency.

Older patients with GH deficiency respond to GH replacement with equal improvements in quality of life and lipid profile when compared with younger patients (210) and demonstrate some improvement in mortality rate. GH therapy in older people resulted in an increase in IGF-1, lean body mass, bone mineral density in the lumbar spine, decrease in total fat mass (111), increased muscle function (167), dyslipidemia, and quality of life (206). Brill and colleagues (211) showed that 1 month of GH and/or testosterone administration improved certain measures of balance and physical performance in older men and increased muscle IGF-I gene expression. There were no significant adverse events during 30 patient-months of intervention. However, the effects of GH replacement on endpoints such as cardiovascular morbidity and mortality and fracture are not fully proven (212). As with the other hormone replacements, safe diagnosis and appropriate GH dosing are necessary to provide the aging individual with the best possible outcome (213). Further long-term efficacy and safety studies are required (111,214).

#### *Potential Risks of Low and High Testosterone*

Testosterone therapy carries a certain risk, especially when the population being treated is unhealthy or when supraphysiologic doses are administered rather than replacement doses. A meta-analysis of Calof and colleagues (215), including 13 studies in their secondary analysis, showed

that the groups of men with testosterone replacement had higher rates of prostate cancer, prostate-specific antigen, and prostate biopsies, although there was a bias toward a greater number of prostate biopsies in the testosterone group. Also, testosterone-treated men had an almost four times higher chance on hematocrit of greater than 50% (erythrocytosis), the most frequent androgen-related adverse event, compared with the placebo group. Cardiovascular event rates did not differ significantly between testosterone-treated and placebo-treated men (216), whereas Basaria and colleagues (217) showed that the application of a testosterone gel was associated with an increased risk of cardiovascular adverse events. However, the men studied in this trial were already frail and had mobility limitations. Other potential side effects interrelated with long-term testosterone treatment are acne, oily skin, reduced sperm production, and fertility (36).

Low concentrations of testosterone may carry risks as well. Although Edler von Eyben and colleagues (218) found that castrated men died less than expected from myocardial infarction implying that men do not have an increased coronary heart disease risk because of low androgen levels, a number of cross-sectional, case-control, and cohort studies have shown that lower testosterone levels in older men are associated with higher atherosclerosis and myocardial infarction (62,219) and higher cardiovascular and overall mortality (32,37,38,151,171,220). Testosterone supplementation may help in these cases but is not without risks and should be carried out with prudence.

#### CONCLUSIONS

Changes in hormone levels contribute to the process of aging because the endocrine system plays a major role in cellular interactions, metabolism, and growth. More specifically, there is a strong clinically important relationship between decreases in androgens and estrogens with age, age-related decline in muscle and bone mass and strength, and eventually health span in humans. Continued research is necessary to establish the proper roles, efficacies, and safe applications of hormone and exercise training therapies in mitigating the sharp and rapid declines in androgen and estrogen concentrations with advancing age and the contribution of these hormones in overall human longevity.

#### FUNDING

This research was supported by a grant from the NIH/NCI grant 5R01 CA127971 to M. Sheffield-Moore.

#### REFERENCES

1. Sheffield-Moore M, Urban RJ. An overview of the endocrinology of skeletal muscle. *Trends Endocrinol Metab.* 2004;15(3):110–115.
2. Calmels P, Vico L, Alexandre C, Minaire P. Cross-sectional study of muscle strength and bone mineral density in a population of 106 women between the ages of 44 and 87 years: relationship with age and menopause. *Eur J Appl Physiol Occup Physiol.* 1995;70(2):180–186.

3. Petrofsky JS, Burse RL, Lind AR. Comparison of physiological responses of women and men to isometric exercise. *J Appl Physiol*. 1975;38(5):863–868.
4. Phillips SK, Rook KM, Siddle NC, Bruce SA, Woledge RC. Muscle weakness in women occurs at an earlier age than in men, but strength is preserved by hormone replacement therapy. *Clin Sci (Lond)*. 1993; 84(1):95–98.
5. Stanley SN, Taylor NA. Isokinetic muscle mechanics in four groups of women of increasing age. *Eur J Appl Physiol Occup Physiol*. 1993;66(2):178–184.
6. Lindle RS, Metter EJ, Lynch NA, et al. Age and gender comparisons of muscle strength in 654 women and men aged 20–93 yr. *J Appl Physiol*. 1997;83(5):1581–1587.
7. Adams O. Life expectancy in Canada—an overview. *Health Rep*. 1990;2(4):361–376.
8. Roubenoff R, Hughes VA. Sarcopenia: current concepts. *J Gerontol Med Sci*. 2000;55(12):M716–M724.
9. Arianayagam R, Arianayagam M, McGrath S, Rashid P. Androgen deficiency in the aging man. *Aust Fam Physician*. 2010;39(10): 752–755.
10. Goodman-Gruen D, Barrett-Connor E. Sex differences in the association of endogenous sex hormone levels and glucose tolerance status in older men and women. *Diabetes Care*. 2000;23(7): 912–918.
11. Gobinet J, Poujol N, Sultan C. Molecular action of androgens. *Mol Cell Endocrinol*. 2002;198(1–2):15–24.
12. Nieschlag E, Behre HM, Nieschlag S. *Andrology: Male Reproductive Health and Dysfunction*. 3rd ed. Berlin, Germany: Springer; 2001.
13. Harman SM, Metter EJ, Tobin JD, Pearson J, Blackman MR. Longitudinal effects of aging on serum total and free testosterone levels in healthy men. Baltimore Longitudinal Study of Aging. *J Clin Endocrinol Metab*. 2001;86(2):724–731.
14. Ferrini RL, Barrett-Connor E. Sex hormones and age: a cross-sectional study of testosterone and estradiol and their bioavailable fractions in community-dwelling men. *Am J Epidemiol*. 1998;147(8): 750–754.
15. Porter MM, Vandervoort AA, Lexell J. Aging of human muscle: structure, function and adaptability. *Scand J Med Sci Sports*. 1995; 5(3):129–142.
16. Phillips SK, Bruce SA, Newton D, Woledge RC. The weakness of old age is not due to failure of muscle activation. *J Gerontol*. 1992;47(2):M45–M49.
17. Veldhuis JD. Aging and hormones of the hypothalamo-pituitary axis: gonadotropic axis in men and somatotrophic axes in men and women. *Ageing Res Rev*. 2008;7(3):189–208.
18. Kaufman JM, Vermeulen A. The decline of androgen levels in elderly men and its clinical and therapeutic implications. *Endocr Rev*. 2005;26(6):833–876.
19. Feldman HA, Longcope C, Derby CA, et al. Age trends in the level of serum testosterone and other hormones in middle-aged men: longitudinal results from the Massachusetts male aging study. *J Clin Endocrinol Metab*. 2002;87(2):589–598.
20. Maurus N, Hayes V, Welch S, et al. Testosterone deficiency in young men: marked alterations in whole body protein kinetics, strength, and adiposity. *J Clin Endocrinol Metab*. 1998;83(6):1886–1892.
21. Brodsky IG, Balagopal P, Nair KS. Effects of testosterone replacement on muscle mass and muscle protein synthesis in hypogonadal men—a clinical research center study. *J Clin Endocrinol Metab*. 1996;81(10):3469–3475.
22. Sheffield-Moore M, Dillon EL, Casperson SL, et al. A randomized pilot study of monthly cycled testosterone replacement or continuous testosterone replacement versus placebo in older men. *J Clin Endocrinol Metab*. 2011;96(11):E1831–E1837.
23. Ferrando AA, Sheffield-Moore M, Yeckel CW, et al. Testosterone administration to older men improves muscle function: molecular and physiological mechanisms. *Am J Physiol Endocrinol Metab*. 2002;282(3):E601–E607.
24. Urban RJ, Bodenbun YH, Gilkison C, et al. Testosterone administration to elderly men increases skeletal muscle strength and protein synthesis. *Am J Physiol*. 1995;269(5 Pt 1):E820–E826.
25. Tenover JS. Effects of testosterone supplementation in the aging male. *J Clin Endocrinol Metab*. 1992;75(4):1092–1098.
26. Roy TA, Blackman MR, Harman SM, Tobin JD, Schragger M, Metter EJ. Interrelationships of serum testosterone and free testosterone index with FFM and strength in aging men. *Am J Physiol Endocrinol Metab*. 2002;283(2):E284–E294.
27. Perry HM 3rd, Miller DK, Patrick P, Morley JE. Testosterone and leptin in older African-American men: relationship to age, strength, function, and season. *Metabolism*. 2000;49(8):1085–1091.
28. Baumgartner RN, Waters DL, Gallagher D, Morley JE, Garry PJ. Predictors of skeletal muscle mass in elderly men and women. *Mech Ageing Dev*. 1999;107(2):123–136.
29. Iannuzzi-Sucich M, Prestwood KM, Kenny AM. Prevalence of sarcopenia and predictors of skeletal muscle mass in healthy, older men and women. *J Gerontol Med Sci*. 2002;57(12):M772–M777.
30. Onder G, Penninx BW, Lapuerta P, et al. Change in physical performance over time in older women: the Women's Health and Aging Study. *J Gerontol Med Sci*. 2002;57(5):M289–M293.
31. Leveille SG, Penninx BW, Melzer D, Izmirlian G, Guralnik JM. Sex differences in the prevalence of mobility disability in old age: the dynamics of incidence, recovery, and mortality. *J Gerontol B Psychol Sci Soc Sci*. 2000;55(1):S41–S50.
32. Laughlin GA, Barrett-Connor E, Bergstrom J. Low serum testosterone and mortality in older men. *J Clin Endocrinol Metab*. 2008; 93(1):68–75.
33. Ding EL, Song Y, Malik VS, Liu S. Sex differences of endogenous sex hormones and risk of type 2 diabetes: a systematic review and meta-analysis. *JAMA*. 2006;295(11):1288–1299.
34. Zarrouf FA, Artz S, Griffith J, Sirbu C, Kommor M. Testosterone and depression: systematic review and meta-analysis. *J Psychiatr Pract*. 2009;15(4):289–305.
35. Dhindsa S, Prabhakar S, Sethi M, Bandyopadhyay A, Chaudhuri A, Dandona P. Frequent occurrence of hypogonadotropic hypogonadism in type 2 diabetes. *J Clin Endocrinol Metab*. 2004;89(11):5462–5468.
36. Bhasin S, Cunningham GR, Hayes FJ, et al. Testosterone therapy in adult men with androgen deficiency syndromes: an endocrine society clinical practice guideline. *J Clin Endocrinol Metab*. 2006;91(6): 1995–2010.
37. Khaw KT, Dowsett M, Folkard E, et al. Endogenous testosterone and mortality due to all causes, cardiovascular disease, and cancer in men: European prospective investigation into cancer in Norfolk (EPIC-Norfolk) Prospective Population Study. *Circulation*. 2007; 116(23):2694–2701.
38. Shores MM, Matsumoto AM, Sloan KL, Kivlahan DR. Low serum testosterone and mortality in male veterans. *Arch Intern Med*. 2006; 166(15):1660–1665.
39. Sheffield-Moore M, Paddon-Jones D, Casperson SL, et al. Androgen therapy induces muscle protein anabolism in older women. *J Clin Endocrinol Metab*. 2006;91(10):3844–3849.
40. Saad F. The role of testosterone in type 2 diabetes and metabolic syndrome in men. *Arq Bras Endocrinol Metabol*. 2009;53(8): 901–907.
41. Saad F, Gooren LJ. The role of testosterone in the etiology and treatment of obesity, the metabolic syndrome, and diabetes mellitus type 2. *J Obes*. 2011;2011:pii:471584.
42. Fink HA, Ewing SK, Ensrud KE, et al. Association of testosterone and estradiol deficiency with osteoporosis and rapid bone loss in older men. *J Clin Endocrinol Metab*. 2006;91(10):3908–3915.
43. Meier C, Nguyen TV, Handelsman DJ, et al. Endogenous sex hormones and incident fracture risk in older men: the Dubbo Osteoporosis Epidemiology Study. *Arch Intern Med*. 2008;168(1):47–54.



44. Tuck SP, Francis RM. Testosterone, bone and osteoporosis. *Front Horm Res.* 2009;37:123–132.
45. Araujo AB, Esche GR, Kupelian V, et al. Prevalence of symptomatic androgen deficiency in men. *J Clin Endocrinol Metab.* 2007;92(11):4241–4247.
46. Wu FC, Tajar A, Pye SR, et al. Hypothalamic-pituitary-testicular axis disruptions in older men are differentially linked to age and modifiable risk factors: the European Male Aging Study. *J Clin Endocrinol Metab.* 2008;93(7):2737–2745.
47. Morales A, Spevack M, Emerson L, et al. Adding to the controversy: pitfalls in the diagnosis of testosterone deficiency syndromes with questionnaires and biochemistry. *Aging Male.* 2007;10(2):57–65.
48. Daniel SAJ, Armstrong ST. Androgens in the ovarian micro environment. *Semin Reprod Endocrinol.* 1986;4:89–100.
49. van Geel TA, Geusens PP, Winkens B, Sels JP, Dinant GJ. Measures of bioavailable serum testosterone and estradiol and their relationships with muscle mass, muscle strength and bone mineral density in postmenopausal women: a cross-sectional study. *Eur J Endocrinol.* 2009;160(4):681–687.
50. Cappola AR, Xue QL, Fried LP. Multiple hormonal deficiencies in anabolic hormones are found in frail older women: the Women's Health and Aging studies. *J Gerontol A Biol Sci Med Sci.* 2009;64(2):243–248.
51. Bachmann G, Bancroft J, Braunstein G, et al. Female androgen insufficiency: the Princeton consensus statement on definition, classification, and assessment. *Fertil Steril.* 2002;77(4):660–665.
52. van der Made F, Bloemers J, Yassem WE, et al. The influence of testosterone combined with a PDE5-inhibitor on cognitive, affective, and physiological sexual functioning in women suffering from sexual dysfunction. *J Sex Med.* 2009;6(3):777–790.
53. Davis SR, McCloud P, Strauss BJ, Burger H. Testosterone enhances estradiol's effects on postmenopausal bone density and sexuality. *Maturitas.* 2008;61(1–2):17–26.
54. Zumoff B, Strain GW, Miller LK, Rosner W. Twenty-four-hour mean plasma testosterone concentration declines with age in normal premenopausal women. *J Clin Endocrinol Metab.* 1995;80(4):1429–1430.
55. Longcope C. Androgen metabolism and the menopause. *Semin Reprod Endocrinol.* 1998;16(2):111–115.
56. Chakravarti S, Collins WP, Forecast JD, Newton JR, Oram DH, Studd JW. Hormonal profiles after the menopause. *Br Med J.* 1976;2(6039):784–787.
57. Ferrucci L, Corsi A, Lauretani F, et al. The origins of age-related proinflammatory state. *Blood.* 2005;105(6):2294–2299.
58. Maggio M, Guralnik JM, Longo DL, Ferrucci L. Interleukin-6 in aging and chronic disease: a magnificent pathway. *J Gerontol A Biol Sci Med Sci.* 2006;61(6):575–584.
59. Stenholm S, Maggio M, Lauretani F, et al. Anabolic and catabolic biomarkers as predictors of muscle strength decline: the InCHIANTI study. *Rejuvenation Res.* 2010;13(1):3–11.
60. Schaap LA, Pluijm SM, Deeg DJ, Visser M. Inflammatory markers and loss of muscle mass (sarcopenia) and strength. *Am J Med.* 2006;119(6):526.e9–526.e17.
61. Khosla S, Atkinson EJ, Dunstan CR, O'Fallon WM. Effect of estrogen versus testosterone on circulating osteoprotegerin and other cytokine levels in normal elderly men. *J Clin Endocrinol Metab.* 2002;87(4):1550–1554.
62. Malkin CJ, Pugh PJ, Jones RD, Kapoor D, Channer KS, Jones TH. The effect of testosterone replacement on endogenous inflammatory cytokines and lipid profiles in hypogonadal men. *J Clin Endocrinol Metab.* 2004;89(7):3313–3318.
63. Yesilova Z, Ozata M, Kocar IH, et al. The effects of gonadotropin treatment on the immunological features of male patients with idiopathic hypogonadotropic hypogonadism. *J Clin Endocrinol Metab.* 2000;85(1):66–70.
64. Bebo BF Jr, Schuster JC, Vandenbark AA, Offner H. Androgens alter the cytokine profile and reduce encephalitogenicity of myelin-reactive T cells. *J Immunol.* 1999;162(1):35–40.
65. Liva SM, Voskuhl RR. Testosterone acts directly on CD4+ T lymphocytes to increase IL-10 production. *J Immunol.* 2001;167(4):2060–2067.
66. Maggio M, Ceda GP, Lauretani F, et al. SHBG, sex hormones, and inflammatory markers in older women. *J Clin Endocrinol Metab.* 2011;96(4):1053–1059.
67. Kendall B, Eston R. Exercise-induced muscle damage and the potential protective role of estrogen. *Sports Med.* 2002;32(2):103–123.
68. Dahlman-Wright K, Cavailles V, Fuqua SA, et al. International Union of Pharmacology. LXIV. Estrogen receptors. *Pharmacol Rev.* 2006;58(4):773–781.
69. Heldring N, Pike A, Andersson S, et al. Estrogen receptors: how do they signal and what are their targets. *Physiol Rev.* 2007;87(3):905–931.
70. Katzenellenbogen BS, Montano MM, Le Goff P, et al. Antiestrogens: mechanisms and actions in target cells. *J Steroid Biochem Mol Biol.* 1995;53(1–6):387–393.
71. Tiidus PM. Can estrogens diminish exercise induced muscle damage? *Can J Appl Physiol.* 1995;20(1):26–38.
72. Tiidus PM. Oestrogen and sex influence on muscle damage and inflammation: evidence from animal models. *Curr Opin Clin Nutr Metab Care.* 2001;4(6):509–513.
73. Vina J, Sastre J, Pallardo FV, Gambini J, Borras C. Role of mitochondrial oxidative stress to explain the different longevity between genders: protective effect of estrogens. *Free Radic Res.* 2006;40(12):1359–1365.
74. MacNeil LG, Baker SK, Stevic I, Tarnopolsky MA. 17beta-estradiol attenuates exercise-induced neutrophil infiltration in men. *Am J Physiol Regul Integr Comp Physiol.* 2011;300(6):R1443–R1451.
75. Enns DL, Tiidus PM. The influence of estrogen on skeletal muscle: sex matters. *Sports Med.* 2010;40(1):41–58.
76. Lemoine S, Granier P, Tiffocche C, Rannou-Bekono F, Thieulant ML, Delamarque P. Estrogen receptor alpha mRNA in human skeletal muscles. *Med Sci Sports Exerc.* 2003;35(3):439–443.
77. Sitnick M, Foley AM, Brown M, Spangenburg EE. Ovariectomy prevents the recovery of atrophied gastrocnemius skeletal muscle mass. *J Appl Physiol.* 2006;100(1):286–293.
78. Wiik A, Ekman M, Johansson O, Jansson E, Esbjornsson M. Expression of both oestrogen receptor alpha and beta in human skeletal muscle tissue. *Histochem Cell Biol.* 2009;131(2):181–189.
79. Moran AL, Nelson SA, Landisch RM, Warren GL, Lowe DA. Estradiol replacement reverses ovariectomy-induced muscle contractile and myosin dysfunction in mature female mice. *J Appl Physiol.* 2007;102(4):1387–1393.
80. Greising SM, Baltgalvis KA, Kosir AM, Moran AL, Warren GL, Lowe DA. Estradiol's beneficial effect on murine muscle function is independent of muscle activity. *J Appl Physiol.* 2011;110(1):109–115.
81. Strehlow K, Rotter S, Wassmann S, et al. Modulation of antioxidant enzyme expression and function by estrogen. *Circ Res.* 2003;93(2):170–177.
82. Vina J, Borras C, Gambini J, Sastre J, Pallardo FV. Why females live longer than males: control of longevity by sex hormones. *Sci Aging Knowledge Environ.* 2005;2005(23):pe17.
83. Baltgalvis KA, Greising SM, Warren GL, Lowe DA. Estrogen regulates estrogen receptors and antioxidant gene expression in mouse skeletal muscle. *PLoS One.* 2010;5(4):e10164.
84. Houser A, McNair C, Piccinini R, Luxhøj A, Bell WE, Turner JE. Effects of estrogen on the neuromuscular system in the embryonic zebrafish (*Danio rerio*). *Brain Res.* 2011;1381:106–116.
85. Wise PM, Dubal DB, Wilson ME, Rau SW, Bottner M, Rosewell KL. Estradiol is a protective factor in the adult and aging brain:

- understanding of mechanisms derived from in vivo and in vitro studies. *Brain Res Brain Res Rev.* 2001;37(1–3):313–319.
86. Kamanga-Sollo E, White ME, Hathaway MR, Weber WJ, Dayton WR. Effect of Estradiol-17beta on protein synthesis and degradation rates in fused bovine satellite cell cultures. *Domest Anim Endocrinol.* 2010;39(1):54–62.
  87. Greising SM, Baltgalvis KA, Lowe DA, Warren GL. Hormone therapy and skeletal muscle strength: a meta-analysis. *J Gerontol A Biol Sci Med Sci.* 2009;64(10):1071–1081.
  88. Ronkainen PH, Kovanen V, Alen M, et al. Postmenopausal hormone replacement therapy modifies skeletal muscle composition and function: a study with monozygotic twin pairs. *J Appl Physiol.* 2009;107(1):25–33.
  89. Maher AC, Akhtar M, Tarnopolsky MA. Men supplemented with 17beta-estradiol have increased beta-oxidation capacity in skeletal muscle. *Physiol Genomics.* 2010;42(3):342–347.
  90. Carville SF, Rutherford OM, Newham DJ. Power output, isometric strength and steadiness in the leg muscles of pre- and postmenopausal women; the effects of hormone replacement therapy. *Eur J Appl Physiol.* 2006;96(3):292–298.
  91. Cooper R, Mishra G, Clennell S, Guralnik J, Kuh D. Menopausal status and physical performance in midlife: findings from a British birth cohort study. *Menopause.* 2008;15(6):1079–1085.
  92. Greeves JP, Cable NT, Reilly T, Kingsland C. Changes in muscle strength in women following the menopause: a longitudinal assessment of the efficacy of hormone replacement therapy. *Clin Sci (Lond).* 1999;97(1):79–84.
  93. Kurina LM, Gulati M, Everson-Rose SA, et al. The effect of menopause on grip and pinch strength: results from the Chicago, Illinois, site of the Study of Women's Health Across the Nation. *Am J Epidemiol.* 2004;160(5):484–491.
  94. Samson MM, Meeuwisen IB, Crowe A, Dessens JA, Duursma SA, Verhaar HJ. Relationships between physical performance measures, age, height and body weight in healthy adults. *Age Ageing.* 2000;29(3):235–242.
  95. Skelton DA, Phillips SK, Bruce SA, Naylor CH, Woledge RC. Hormone replacement therapy increases isometric muscle strength of adductor pollicis in post-menopausal women. *Clin Sci (Lond).* 1999;96(4):357–364.
  96. Cauley JA, Gutai JP, Kuller LH, LeDonne D, Powell JG. The epidemiology of serum sex hormones in postmenopausal women. *Am J Epidemiol.* 1989;129(6):1120–1131.
  97. Sipilä S. Body composition and muscle performance during menopause and hormone replacement therapy. *J Endocrinol Invest.* 2003;26(9):893–901.
  98. Clarkson PM, Hubal MJ. Are women less susceptible to exercise-induced muscle damage? *Curr Opin Clin Nutr Metab Care.* 2001;4(6):527–531.
  99. Trachootham D, Lu W, Ogasawara MA, Nilsa RD, Huang P. Redox regulation of cell survival. *Antioxid Redox Signal.* 2008;10(8):1343–1374.
  100. Imai Y, Youn MY, Kondoh S, et al. Estrogens maintain bone mass by regulating expression of genes controlling function and life span in mature osteoclasts. *Ann NY Acad Sci.* 2009;1173(suppl 1):E31–E39.
  101. Lee NK, Sowa H, Hinoi E, et al. Endocrine regulation of energy metabolism by the skeleton. *Cell.* 2007;130(3):456–469.
  102. Syed F, Khosla S. Mechanisms of sex steroid effects on bone. *Biochem Biophys Res Commun.* 2005;328(3):688–696.
  103. Ryan KJ, Naftolin F, Reddy V, Flores F, Petro Z. Estrogen formation in the brain. *Am J Obstet Gynecol.* 1972;114(4):454–460.
  104. Naftolin F, Ryan KJ, Petro Z. Aromatization of androstenedione by the diencephalon. *J Clin Endocrinol Metab.* 1971;33(2):368–370.
  105. Naftolin F, Ryan KJ, Petro Z. Aromatization of androstenedione by limbic system tissue from human fetuses. *J Endocrinol.* 1971;51(4):795–796.
  106. Abney TO. The potential roles of estrogens in regulating Leydig cell development and function: a review. *Steroids.* 1999;64(9):610–617.
  107. Nilsson S, Makela S, Treuter E, et al. Mechanisms of estrogen action. *Physiol Rev.* 2001;81(4):1535–1565.
  108. Vandenput L, Ohlsson C. Estrogens as regulators of bone health in men. *Nat Rev Endocrinol.* 2009;5(8):437–443.
  109. Clarke BL, Khosla S. Physiology of bone loss. *Radiol Clin North Am.* 2010;48(3):483–495.
  110. Ohlsson C, Vandenput L. The role of estrogens for male bone health. *Eur J Endocrinol.* 2009;160(6):883–889.
  111. Sherlock M, Toogood AA. Aging and the growth hormone/insulin like growth factor-I axis. *Pituitary.* 2007;10(2):189–203.
  112. Salminen A, Kaarniranta K. Insulin/IGF-I paradox of aging: regulation via AKT/IKK/NF-kappaB signaling. *Cell Signal.* 2010;22(4):573–577.
  113. Lytras A, Tolis G. Assessment of endocrine and nutritional status in age-related catabolic states of muscle and bone. *Curr Opin Clin Nutr Metab Care.* 2007;10(5):604–610.
  114. Ho KY, Evans WS, Blizzard RM, et al. Effects of sex and age on the 24-hour profile of growth hormone secretion in man: importance of endogenous estradiol concentrations. *J Clin Endocrinol Metab.* 1987;64(1):51–58.
  115. Rodon J, DeSantos V, Ferry RJ Jr, Kurzrock R. Early drug development of inhibitors of the insulin-like growth factor-I receptor pathway: lessons from the first clinical trials. *Mol Cancer Ther.* 2008;7(9):2575–2588.
  116. Sandhu MS, Heald AH, Gibson JM, Cruickshank JK, Dunger DB, Wareham NJ. Circulating concentrations of insulin-like growth factor-I and development of glucose intolerance: a prospective observational study. *Lancet.* 2002;359(9319):1740–1745.
  117. Juul A. Serum levels of insulin-like growth factor I and its binding proteins in health and disease. *Growth Horm IGF Res.* 2003;13(4):113–170.
  118. Zofkova I. Pathophysiological and clinical importance of insulin-like growth factor-I with respect to bone metabolism. *Physiol Res.* 2003;52(6):657–679.
  119. Trejo JL, Piriz J, Llorens-Martin MV, et al. Central actions of liver-derived insulin-like growth factor I underlying its pro-cognitive effects. *Mol Psychiatry.* 2007;12(12):1118–1128.
  120. Suh Y, Atzmon G, Cho MO, et al. Functionally significant insulin-like growth factor I receptor mutations in centenarians. *Proc Natl Acad Sci U S A.* 2008;105(9):3438–3442.
  121. Iranmanesh A, Lizarralde G, Veldhuis JD. Age and relative adiposity are specific negative determinants of the frequency and amplitude of growth hormone (GH) secretory bursts and the half-life of endogenous GH in healthy men. *J Clin Endocrinol Metab.* 1991;73(5):1081–1088.
  122. Lamberts SW, van den Beld AW, van der Lely AJ. The endocrinology of aging. *Science.* 1997;278(5337):419–424.
  123. Cappola AR, Xue QL, Ferrucci L, Guralnik JM, Volpato S, Fried LP. Insulin-like growth factor I and interleukin-6 contribute synergistically to disability and mortality in older women. *J Clin Endocrinol Metab.* 2003;88(5):2019–2025.
  124. Bartke A. Growth hormone, insulin and aging: the benefits of endocrine defects. *Exp Gerontol.* 2011;46(2–3):108–111.
  125. Barzilay N, Gabrieli I. Genetic studies reveal the role of the endocrine and metabolic systems in aging. *J Clin Endocrinol Metab.* 2010;95(10):4493–500.
  126. Dreyer HC, Fujita S, Glynn EL, Drummond MJ, Volpi E, Rasmussen BB. Resistance exercise increases leg muscle protein synthesis and mTOR signalling independent of sex. *Acta Physiol (Oxf).* 2010;199(1):71–81.
  127. Gasier HG, Fluckey JD, Previs SF, Wiggs MP, Riechman SE. Acute resistance exercise augments integrative myofibrillar protein synthesis. *Metabolism.* 2012;61(2):153–156.

128. Vingren JL, Kraemer WJ, Ratamess NA, Anderson JM, Volek JS, Maresh CM. Testosterone physiology in resistance exercise and training: the up-stream regulatory elements. *Sports Med.* 2010; 40(12):1037–1053.
129. Aizawa K, Iemitsu M, Maeda S, Mesaki N, Ushida T, Akimoto T. Endurance exercise training enhances local sex steroidogenesis in skeletal muscle. *Med Sci Sports Exerc.* 2011;43(11):2072–2080.
130. Kraemer WJ, Hakkinen K, Newton RU, et al. Acute hormonal responses to heavy resistance exercise in younger and older men. *Eur J Appl Physiol Occup Physiol.* 1998;77(3):206–211.
131. Hakkinen K, Pakarinen A, Kraemer WJ, Newton RU, Alen M. Basal concentrations and acute responses of serum hormones and strength development during heavy resistance training in middle-aged and elderly men and women. *J Gerontol Biol Sci.* 2000;55(2): B95–B105.
132. Kraemer WJ, Hakkinen K, Newton RU, et al. Effects of heavy-resistance training on hormonal response patterns in younger vs. older men. *J Appl Physiol.* 1999;87(3):982–992.
133. Baker JR, Bemben MG, Anderson MA, Bemben DA. Effects of age on testosterone responses to resistance exercise and musculoskeletal variables in men. *J Strength Cond Res.* 2006;20(4):874–881.
134. Hakkinen K, Pakarinen A, Newton RU, Kraemer WJ. Acute hormone responses to heavy resistance lower and upper extremity exercise in young versus old men. *Eur J Appl Physiol Occup Physiol.* 1998;77(4):312–319.
135. Nindl BC, Kraemer WJ, Gotshalk LA, et al. Testosterone responses after resistance exercise in women: influence of regional fat distribution. *Int J Sport Nutr Exerc Metab.* 2001;11(4):451–465.
136. Copeland JL, Consitt LA, Tremblay MS. Hormonal responses to endurance and resistance exercise in females aged 19–69 years. *J Gerontol Biol Sci.* 2002;57(4):B158–B165.
137. Vingren JL, Kraemer WJ, Hatfield DL, et al. Effect of resistance exercise on muscle steroid receptor protein content in strength-trained men and women. *Steroids.* 2009;74(13–14):1033–1039.
138. Linnamo V, Pakarinen A, Komi PV, Kraemer WJ, Hakkinen K. Acute hormonal responses to submaximal and maximal heavy resistance and explosive exercises in men and women. *J Strength Cond Res.* 2005;19(3):566–571.
139. Consitt LA, Copeland JL, Tremblay MS. Hormone responses to resistance vs. endurance exercise in premenopausal females. *Can J Appl Physiol.* 2001;26(6):574–587.
140. Kraemer WJ, Fleck SJ, Dziados JE, et al. Changes in hormonal concentrations after different heavy-resistance exercise protocols in women. *J Appl Physiol.* 1993;75(2):594–604.
141. Marx JO, Ratamess NA, Nindl BC, et al. Low-volume circuit versus high-volume periodized resistance training in women. *Med Sci Sports Exerc.* 2001;33(4):635–643.
142. Kvorning T, Andersen M, Brixen K, Schjerling P, Suetta C, Madsen K. Suppression of testosterone does not blunt mRNA expression of myoD, myogenin, IGF, myostatin or androgen receptor post strength training in humans. *J Physiol.* 2007;578(Pt 2):579–593.
143. Kraemer WJ, French DN, Spiering BA, et al. Cortisol supplementation reduces serum cortisol responses to physical stress. *Metabolism.* 2005;54(5):657–668.
144. Nakamura Y, Hornsby PJ, Casson P, et al. Type 5  $\beta$ -hydroxysteroid dehydrogenase (AKR1C3) contributes to testosterone production in the adrenal reticularis. *J Clin Endocrinol Metab.* 2009;94(6): 2192–2198.
145. Hakkinen K, Pakarinen A, Kraemer WJ, Hakkinen A, Valkeinen H, Alen M. Selective muscle hypertrophy, changes in EMG and force, and serum hormones during strength training in older women. *J Appl Physiol.* 2001;91(2):569–580.
146. Borst SE, Vincent KR, Lowenthal DT, Braith RW. Effects of resistance training on insulin-like growth factor and its binding proteins in men and women aged 60 to 85. *J Am Geriatr Soc.* 2002;50(5): 884–888.
147. Skelton DA, Young A, Greig CA, Malbut KE. Effects of resistance training on strength, power, and selected functional abilities of women aged 75 and older. *J Am Geriatr Soc.* 1995;43(10):1081–1087.
148. Judge JO, Underwood M, Gennosa T. Exercise to improve gait velocity in older persons. *Arch Phys Med Rehabil.* 1993;74(4): 400–406.
149. Harridge SD, Kryger A, Stensgaard A. Knee extensor strength, activation, and size in very elderly people following strength training. *Muscle Nerve.* 1999;22(7):831–839.
150. Schulz R, Curnow C. Peak performance and age among superathletes: track and field, swimming, baseball, tennis, and golf. *J Gerontol.* 1988;43(5):P113–P120.
151. Maggio M, Lauretani F, Ceda GP, et al. Relationship between low levels of anabolic hormones and 6-year mortality in older men: the aging in the Chianti Area (InCHIANTI) study. *Arch Intern Med.* 2007;167(20):2249–2254.
152. Jones TH, Saad F. The effects of testosterone on risk factors for, and the mediators of, the atherosclerotic process. *Atherosclerosis.* 2009;207(2):318–327.
153. Bonora E, Kiechl S, Willeit J, et al. Insulin resistance as estimated by homeostasis model assessment predicts incident symptomatic cardiovascular disease in caucasian subjects from the general population: the Bruneck study. *Diabetes Care.* 2007;30(2):318–324.
154. de Simone G, Devereux RB, Chinali M, et al. Prognostic impact of metabolic syndrome by different definitions in a population with high prevalence of obesity and diabetes: the Strong Heart Study. *Diabetes Care.* 2007;30(7):1851–1856.
155. Saely CH, Aczel S, Marte T, Langer P, Hoefle G, Drexel H. The metabolic syndrome, insulin resistance, and cardiovascular risk in diabetic and nondiabetic patients. *J Clin Endocrinol Metab.* 2005; 90(10):5698–5703.
156. Traish AM, Saad F, Feeley RJ, Guay A. The dark side of testosterone deficiency: III. Cardiovascular disease. *J Androl.* 2009;30(5): 477–494.
157. Nieschlag E, Nieschlag S, Behre HM. Lifespan and testosterone. *Nature.* 1993;366(6452):215.
158. Mudali S, Dobs AS. Effects of testosterone on body composition of the aging male. *Mech Ageing Dev.* 2004;125(4):297–304.
159. Ferrando AA, Sheffield-Moore M, Paddon-Jones D, Wolfe RR, Urban RJ. Differential anabolic effects of testosterone and amino acid feeding in older men. *J Clin Endocrinol Metab.* 2003;88(1):358–362.
160. Page ST, Amory JK, Bowman FD, et al. Exogenous testosterone (T) alone or with finasteride increases physical performance, grip strength, and lean body mass in older men with low serum T. *J Clin Endocrinol Metab.* 2005;90(3):1502–1510.
161. Harman SM, Blackman MR. The effects of growth hormone and sex steroid on lean body mass, fat mass, muscle strength, cardiovascular endurance and adverse events in healthy elderly women and men. *Horm Res.* 2003;60(suppl 1):121–124.
162. Wittert GA, Chapman IM, Haren MT, Mackintosh S, Coates P, Morley JE. Oral testosterone supplementation increases muscle and decreases fat mass in healthy elderly males with low-normal gonadal status. *J Gerontol A Biol Sci Med Sci.* 2003;58(7):618–625.
163. Bhasin S, Storer TW, Berman N, et al. Testosterone replacement increases fat-free mass and muscle size in hypogonadal men. *J Clin Endocrinol Metab.* 1997;82(2):407–413.
164. Kenny AM, Prestwood KM, Gruman CA, Marcello KM, Raisz LG. Effects of transdermal testosterone on bone and muscle in older men with low bioavailable testosterone levels. *J Gerontol Med Sci.* 2001;56(5):M266–M272.
165. Bhasin S, Storer TW, Berman N, et al. The effects of supraphysiologic doses of testosterone on muscle size and strength in normal men. *N Engl J Med.* 1996;335(1):1–7.
166. Dillon EL, Durham WJ, Urban RJ, Sheffield-Moore M. Hormone treatment and muscle anabolism during aging: androgens. *Clin Nutr.* 2010;29(6):697–700.

167. Urban RJ. Effects of testosterone and growth hormone on muscle function. *J Lab Clin Med.* 1999;134(1):7–10.
168. Snyder PJ, Peachey H, Hannoush P, et al. Effect of testosterone treatment on body composition and muscle strength in men over 65 years of age. *J Clin Endocrinol Metab.* 1999;84(8):2647–2653.
169. Sattler F, Bhasin S, He J, et al. Testosterone threshold levels and lean tissue mass targets needed to enhance skeletal muscle strength and function: the HORMA trial. *J Gerontol A Biol Sci Med Sci.* 2011;66(1):122–129.
170. Schroeder ET, He J, Yarasheski KE, et al. Value of measuring muscle performance to assess changes in lean mass with testosterone and growth hormone supplementation [published online ahead of print July 12, 2011]. *Eur J Appl Physiol.* doi:10.1007/s00421-011-2077-y
171. Yeap BB. Androgens and cardiovascular disease. *Curr Opin Endocrinol Diabetes Obes.* 2010;17(3):269–276.
172. Jones TH. Testosterone deficiency: a risk factor for cardiovascular disease? *Trends Endocrinol Metab.* 2010;21(8):496–503.
173. Worboys S, Kotsopoulos D, Teede H, McGrath B, Davis SR. Evidence that parenteral testosterone therapy may improve endothelium-dependent and -independent vasodilation in postmenopausal women already receiving estrogen. *J Clin Endocrinol Metab.* 2001;86(1):158–161.
174. Zang H, Carlstrom K, Amer P, Hirschberg AL. Effects of treatment with testosterone alone or in combination with estrogen on insulin sensitivity in postmenopausal women. *Fertil Steril.* 2006;86(1):136–144.
175. Burckart K, Beca S, Urban RJ, Sheffield-Moore M. Pathogenesis of muscle wasting in cancer cachexia: targeted anabolic and anticatabolic therapies. *Curr Opin Clin Nutr Metab Care.* 2010;13(4):410–416.
176. Canguen O, Albayrak S. Do low testosterone levels contribute to the pathogenesis of asthma? *Med Hypotheses.* 2011;76(4):585–588.
177. Mason A, Wong SC, McGrogan P, Ahmed SF. Effect of testosterone therapy for delayed growth and puberty in boys with inflammatory bowel disease. *Horm Res Paediatr.* 2011;75(1):8–13.
178. Cutolo M. Androgens in rheumatoid arthritis: when are they effectors? *Arthritis Res Ther.* 2009;11(5):126.
179. Ferrando AA, Sheffield-Moore M, Wolf SE, Herndon DN, Wolfe RR. Testosterone administration in severe burns ameliorates muscle catabolism. *Crit Care Med.* 2001;29(10):1936–1942.
180. Lephart ED, Baxter CR, Parker CR Jr. Effect of burn trauma on adrenal and testicular steroid hormone production. *J Clin Endocrinol Metab.* 1987;64(4):842–848.
181. Chlebowski RT, Heber D. Hypogonadism in male patients with metastatic cancer prior to chemotherapy. *Cancer Res.* 1982;42(6):2495–2498.
182. Todd BD. Pancreatic carcinoma and low serum testosterone; a correlation secondary to cancer cachexia? *Eur J Surg Oncol.* 1988;14(3):199–202.
183. Evans WJ, Morley JE, Argiles J, et al. Cachexia: a new definition. *Clin Nutr.* 2008;27(6):793–799.
184. Vigano A, Piccioni M, Trutschnigg B, Hornby L, Chaudhury P, Kilgour R. Male hypogonadism associated with advanced cancer: a systematic review. *Lancet Oncol.* 2010;11(7):679–684.
185. Shabsigh R, Crawford ED, Nehra A, Slawin KM. Testosterone therapy in hypogonadal men and potential prostate cancer risk: a systematic review. *Int J Impot Res.* 2009;21(1):9–23.
186. Bhasin S. Testosterone supplementation for aging-associated sarcopenia. *J Gerontol A Biol Sci Med Sci.* 2003;58(11):1002–1008.
187. Lowe DA, Baltgalvis KA, Greising SM. Mechanisms behind estrogen's beneficial effect on muscle strength in females. *Exerc Sport Sci Rev.* 2010;38(2):61–67.
188. Meeuwssen IB, Samson MM, Verhaar HJ. Evaluation of the applicability of HRT as a preservative of muscle strength in women. *Maturitas.* 2000;36(1):49–61.
189. Dieli-Conwright CM, Spektor TM, Rice JC, Sattler FR, Schroeder ET. Hormone therapy attenuates exercise-induced skeletal muscle damage in postmenopausal women. *J Appl Physiol.* 2009;107(3):853–858.
190. Jones ME, Boon WC, Proietto J, Simpson ER. Of mice and men: the evolving phenotype of aromatase deficiency. *Trends Endocrinol Metab.* 2006;17(2):55–64.
191. Grumbach MM, Auchus RJ. Estrogen: consequences and implications of human mutations in synthesis and action. *J Clin Endocrinol Metab.* 1999;84(12):4677–4694.
192. Jankowska EA, Rozentryt P, Ponikowska B, et al. Circulating estradiol and mortality in men with systolic chronic heart failure. *JAMA.* 2009;301(18):1892–1901.
193. Arnlov J, Pencina MJ, Amin S, et al. Endogenous sex hormones and cardiovascular disease incidence in men. *Ann Intern Med.* 2006;145(3):176–184.
194. Abbott RD, Launer LJ, Rodriguez BL, et al. Serum estradiol and risk of stroke in elderly men. *Neurology.* 2007;68(8):563–568.
195. Pinkerton JV, Stovall DW. Reproductive aging, menopause, and health outcomes. *Ann NY Acad Sci.* 2010;1204:169–178.
196. Birkhauser MH. Quality of life and sexuality issues in aging women. *Climacteric.* 2009;12(suppl 1):52–57.
197. Michael YL, Gold R, Manson JE, et al. Hormone therapy and physical function change among older women in the Women's Health Initiative: a randomized controlled trial. *Menopause.* 2010;17(2):295–302.
198. van Nes JG, Seynaeve C, Maartense E, et al. Patterns of care in Dutch postmenopausal patients with hormone-sensitive early breast cancer participating in the Tamoxifen Exemestane Adjuvant Multinational (TEAM) trial. *Ann Oncol.* 2010;21(5):974–982.
199. Yager JD, Davidson NE. Estrogen carcinogenesis in breast cancer. *N Engl J Med.* 2006;354(3):270–282.
200. Hulley S, Furberg C, Barrett-Connor E, et al. Noncardiovascular disease outcomes during 6.8 years of hormone therapy: Heart and Estrogen/progestin Replacement Study follow-up (HERS II). *JAMA.* 2002;288(1):58–66.
201. Aguiar-Oliveira MH, Oliveira FT, Pereira RM, et al. Longevity in untreated congenital growth hormone deficiency due to a homozygous mutation in the GHRH receptor gene. *J Clin Endocrinol Metab.* 2010;95(2):714–721.
202. Besson A, Salemi S, Gallati S, et al. Reduced longevity in untreated patients with isolated growth hormone deficiency. *J Clin Endocrinol Metab.* 2003;88(8):3664–3667.
203. Murray RD, Wieringa G, Lawrance JA, Adams JE, Shalet SM. Partial growth hormone deficiency is associated with an adverse cardiovascular risk profile and increased carotid intima-medial thickness. *Clin Endocrinol (Oxf).* 2010;73(4):508–515.
204. Sherlock M, Ayuk J, Tomlinson JW, et al. Mortality in patients with pituitary disease. *Endocr Rev.* 2010;31(3):301–342.
205. Stochholm K, Christiansen J, Laursen T, Gravholt CH. Mortality and reduced growth hormone secretion. *Horm Res.* 2007;68(suppl 5):173–176.
206. Verhelst J, Abs R. Cardiovascular risk factors in hypopituitary GH-deficient adults. *Eur J Endocrinol.* 2009;161(suppl 1):S41–S49.
207. Maggio M, Cattabiani C, Lauretani F, et al. The concept of multiple hormonal dysregulation. *Acta Biomed.* 2010;81(suppl 1):19–29.
208. Elhadd TA, Abdu TA, Oxtoby J, et al. Biochemical and biophysical markers of endothelial dysfunction in adults with hypopituitarism and severe GH deficiency. *J Clin Endocrinol Metab.* 2001;86(9):4223–4232.
209. Colao A, Di Somma C, Spiezia S, et al. The natural history of partial growth hormone deficiency in adults: a prospective study on the cardiovascular risk and atherosclerosis. *J Clin Endocrinol Metab.* 2006;91(6):2191–2200.
210. Monson JP, Abs R, Bengtsson BA, et al. Growth hormone deficiency and replacement in elderly hypopituitary adults. KIMS Study Group and the KIMS International Board. Pharmacia and Upjohn

- International Metabolic Database. *Clin Endocrinol (Oxf)*. 2000;53(3):281–289.
211. Brill KT, Weltman AL, Gentili A, et al. Single and combined effects of growth hormone and testosterone administration on measures of body composition, physical performance, mood, sexual function, bone turnover, and muscle gene expression in healthy older men. *J Clin Endocrinol Metab*. 2002;87(12):5649–5657.
212. Mathioudakis N, Salvatori R. Adult-onset growth hormone deficiency: causes, complications and treatment options. *Curr Opin Endocrinol Diabetes Obes*. 2008;15(4):352–358.
213. Thomas JD, Monson JP. Adult GH deficiency throughout lifetime. *Eur J Endocrinol*. 2009;161(suppl 1):S97–S106.
214. Laron Z. Do deficiencies in growth hormone and insulin-like growth factor-1 (IGF-1) shorten or prolong longevity? *Mech Ageing Dev*. 2005;126(2):305–307.
215. Calof OM, Singh AB, Lee ML, et al. Adverse events associated with testosterone replacement in middle-aged and older men: a meta-analysis of randomized, placebo-controlled trials. *J Gerontol A Biol Sci Med Sci*. 2005;60(11):1451–1457.
216. Bhasin S, Buckwalter JG. Testosterone supplementation in older men: a rational idea whose time has not yet come. *J Androl*. 2001;22(5):718–731.
217. Basaria S, Coviello AD, Travison TG, et al. Adverse events associated with testosterone administration. *N Engl J Med*. 2010;363(2):109–122.
218. Eyben FE, Graugaard C, Vaeth M. All-cause mortality and mortality of myocardial infarction for 989 legally castrated men. *Eur J Epidemiol*. 2005;20(10):863–869.
219. Hak AE, Wittman JC, de Jong FH, Geerlings MI, Hofman A, Pols HA. Low levels of endogenous androgens increase the risk of atherosclerosis in elderly men: the Rotterdam study. *J Clin Endocrinol Metab*. 2002;87(8):3632–3639.
220. Shores MM, Moceri VM, Gruenewald DA, Brodtkin KI, Matsumoto AM, Kivlahan DR. Low testosterone is associated with decreased function and increased mortality risk: a preliminary study of men in a geriatric rehabilitation unit. *J Am Geriatr Soc*. 2004;52(12):2077–2081.
